# Supplementary material
Source: bioRxiv or medRxiv preprint supplement (https://www.biorxiv.org/highwire/filestream/125689/field_highwire_adjunct_files/1/416701-10.pdf)
Supplement: Supplementary file [file 416701-10.pdf]

## Supplemental Material and Methods

### 2 **Fluorescence in situ hybridization**

3 Carriers were removed directly from the pilot reactor and fixed in 4% paraformaldehyde for  
4 8h at 4°C. Following fixation the biofilms were rinsed by immersing the carriers twice in  
5 phosphate-buffered saline (PBS) for 15 min, after which the carriers were stored in 50:50  
6 PBS-ethanol at -20°C until analysis.

### 7 **Preparation of qFISH:**

8 Biofilm suspensions were used for qFISH by brushing off the fixed biofilm from three Z50  
9 and three Z400 carriers and homogenizing the biomass in PBS. The biofilm suspensions were  
10 stored in 50:50 PBS-ethanol at -20°C until use. Prior to FISH, 15 µl aliquots were spotted  
11 onto SuperFrost Plus Gold microscope slides (Menzel GmbH, Braunschweig, Germany). A  
12 hydrophobic barrier frame was applied to the glass slides around the regions containing the  
13 biofilm suspensions by using a Liquid Blocker Mini Pap Pen (Thermo Fisher Scientific, USA)

### 14 **Differences between qFISH and sequence abundance**

15 qFISH and Miseq are complementary methods and differences are expected because methods  
16 are based on different principles; sequencing detect rDNA and FISH detect rRNA. For  
17 instance, we noticed that the signal strength of the AMX820 probe was low for many  
18 anammox cells, which can lead to difficulties in distinguish signal from background during  
19 image segmentation. Also differences in ribosomal gene copy number, DNA extraction  
20 methods as well as e-DNA could influence sequencing results (1, 2). Also, underestimation of  
21 *Nitrosomonas* in 16S rRNA PCR methods compare to qFISH has been noticed in several  
22 studies (3, 4), perhaps depending on relatively high ribosomal content even in inactive cells  
23 (5). Hence, all methods suffer from limitations and multiple methods provide important  
24 complementary information.

25 **Preparation of cryosections:**

26 After fixation, a 1 cm<sup>2</sup> section of the carrier, was selected and cut for cryosectioning. To  
27 remove the biofilm from the plastic, the carrier section was placed in a container filled with  
28 Optimal Cutting Temperature (O.C.T.) compound (VWR, USA) and stored overnight at 4°C.  
29 The next day the container was placed in a container with dry ice until the O.C.T. compound  
30 was completely frozen, after which the plastic carrier section could be removed while biofilm  
31 remained attached to the compound. The intact biofilm was covered with more compound  
32 before it was re-frozen and stored at -80°C until use. Biofilm cryosections were obtained  
33 using a HM550 microtome cryostat (MICROM International GmbH, Germany) at -20°C,  
34 cutting out 20–25 µm thick cross-sections of the biofilm which were collected on SuperFrost  
35 Plus Gold microscope slides (Menzel GmbH, Braunschweig, Germany). Finally, the slides  
36 were covered with a low melting agarose layer to avoid biomass detachment during FISH.  
37 FISH was performed at 46°C for 2 h (6). When probes with different hybridization stringency  
38 optima were applied to the same sample, consecutive hybridizations were performed,  
39 beginning with the probe(s) requiring the most stringent conditions (6). Competitor probes  
40 were added as unlabeled oligonucleotides in equimolar amounts as the labeled probes to the  
41 hybridization mix, in order to increase hybridization specificity. For qFISH a permeable  
42 nucleic acids stain, SYTO 40 was used as reference (Thermo Fisher Scientific, USA) and  
43 specific population probes (see Table S1) were labeled with Cy3 or Cy5. During FISH on  
44 cryosections populations were labelled with FAM, Cy3, Cy5 and one of the probes was  
45 double labeled with Cy3 and Cy5 (7). Labeled oligonucleotides were synthesized by Eurofins  
46 Genomics (Germany). Counterstaining with SYTO 40 (Thermo Fisher Scientific, USA) was  
47 done at 10 µM for 30 minutes. After FISH and counterstaining, the slides were mounted in the  
48 antifadant Prolong Diamong Antifade (Thermo Fisher Scientific, USA).

49 **Microscopy and image analysis**

50 Images were acquired using a Zeiss LSM700 confocal microscope (Carl Zeiss, Germany),  
51 using laser lines of 405, 488, 555 and 639 nm at settings of frame mode and averaging = 4.

52 The same pinhole size was used in all channels, equivalent to 1AU for the Cy5 channel.

53 Images were obtained with a 40×/1.3 plan-apochromat oil objective. To create composite  
54 images of large size, the tile function of the Zeiss ZEN2012 software was used. Contrast of  
55 SYTO 40 was lowered in images of cryosections to facilitate visualization of populations;  
56 intensity of the Cy5 channel was increased due to low Cy5 signal for the double labelled  
57 probe. For qFISH pictures were taken from 30 random fields of view for each target  
58 populations in each carrier type.

59 The relative abundances of the target populations for qFISH was estimated on biofilm  
60 suspensions as the ratios of the FISH-targeted biovolumes of the specific populations to the  
61 total FISH-targeted biovolumes (SYTO 40, Table S1) in daime2.1 (8). After importing the  
62 image channels, noise reduction (4 voxels) and median filtering was used (1 voxel). For all  
63 channels, low intensity pixels, below a threshold of 75, were removed. For 2-D segmentation,  
64 biomass detection was done by thresholding using the RATS-L algorithm. Boolean operations  
65 were used in the image masks to remove signal no present in the reference channel.  
66 Biovolume fraction was calculated using the SYTO-channel as reference.

67 Targets, hybridization conditions and references for the FISH probes are described in table  
68 S1.

69

70

71 **Biofilm structure staining**

72 The biofilm matrix was stained in cryosections with FilmTracer SYPRO Ruby biofilm matrix  
73 stain (Thermo Fisher Scientific, USA) using 200µl for 30 min. The slides were then mounted  
74 with Prolong Diamong Antifade. For microscopy a laser line of 488nm was used, with  
75 settings of frame mode and averaging = 4. A pinhole size was used equivalent to 1AU.  
76 Images were obtained with a 40×/1.3 plan-apochromat oil objective.

77 **DNA extraction and 16s sequencing**

78 Biomass was removed from the Z-carriers by brushing it into 4 ml of sterile water, with the  
79 resulting suspension being transferred to a 15ml centrifuge tube. The suspension was  
80 centrifuged at 4653g for 3 minutes and the supernatant was discarded. 978 µl of sodium  
81 phosphate buffer and 122 µl of MT buffer, of the FastDNA SPIN kit for soil (MP  
82 Biomedicals), were added to the 15 ml centrifuge tubes. The biofilms were resuspended by  
83 pipetting and 1.1 ml of the suspensions were transferred to Lysing Matrix E tubes. FastPrep  
84 homogenization and subsequent purification steps were done according to manufacturer  
85 instructions.

86 PCR amplification of the v4 region of the 16S rRNA gene was done with primers 515F' (9)  
87 and 806R (10), using dual indexing of the primers (11). 40 ng of template were amplified  
88 using a Phusion Hot Start II DNA Polymerase (Thermo Fisher Scientific, USA). The  
89 following PCR program was used: activation (98°C, 30 s); 30 cycles of denaturation (98°C,  
90 10 s), annealing (56°C, 30 s) and elongation (72°C, 15 s); followed by final elongation (72°C,  
91 10 min). PCR products were purified with the MagJET NGS Cleanup and Size Selection Kit  
92 (Thermo Fisher Scientific, USA). DNA concentrations of the purified products were  
93 measured using a Qubit 3.0 fluorometer (Thermo Fisher Scientific, USA), using the dsDNA  
94 HS assay kit (Thermo Fisher Scientific, USA). The obtained products were quality checked

95 by standard gel electrophoresis. Purified PCR products were pooled in equimolar amounts.  
96 Quality control of the pooled PCR product was performed on a TapeStation 2200 (Agilent  
97 Technologies). PhiX control library was spiked in at 7.5%. Sequencing was performed on an  
98 Illumina MiSeq using the MiSeq Reagent Kit v2.

99 Raw sequence reads were processed in Usearch (version 10). Paired-end reads were merged  
100 with the fastq\_mergepairs command allowing a maximum of 12 mismatches in the alignment.  
101 This resulted in 2 113 324 merged reads. The merged reads were quality filtered using a  
102 maximum expected error cutoff of 0.5 and a minimum sequence length of 200 bp. The quality  
103 filtered reads were used as input to the Unoise algorithm (12) to generate sequence variants. A  
104 minimum abundance threshold of 4 was specified in the unoise3 command. This means that  
105 sequence variants were discarded if they were represented by fewer than 4 quality filtered  
106 reads across all samples. In total, 1 657 741 reads were mapped to 3692 sequence variants.  
107 Taxonomic classification was done with the syntax algorithm (13) and the SILVA 128 training  
108 set database was used for taxonomic classification (14).

109

## 110 **NITROGEN TRANSFORMATION ACTIVITY TESTS**

### 111 **Actual activity test**

112 Actual activity was measured in 1 L reactors in duplicate: Two reactors with 100 Z50 carriers,  
113 each, and two with 100 Z400 carriers, each. The incoming water was same as the water  
114 feeding the 0.5 m<sup>3</sup> reactor. At the time of measurement the NH<sub>4</sub><sup>+</sup>-N concentration was 19.6  
115 mg/L, the DO was 5.5 mg/L, and the temperature was kept at 20°C. Mixing was achieved by  
116 supplying a gas mix consisting of N<sub>2</sub>-gas and air to the bottom of the reactors at an  
117 approximate total flow of 3 L/min and the DO was controlled to 5.5 mg/L by adjusting the

118 amount of air in the gas mix. Nitrification rates were measured from mass balance as  $\text{NO}_2^-$ -N  
119 and  $\text{NO}_3^-$ -N  $\text{mg/m}^2$ ,day.

## 120 **Potential activity trials**

121 For the potential activity trials 3 L reactors, containing 400 carriers each, were used. The  
122 substrate consisted of  $\text{NaHCO}_3^-$  buffer, pH adjusted to 7.5 using  $\text{H}_2\text{SO}_4$ , with phosphorous  
123 and trace minerals added in excess (15). Aerobic removal of  $\text{NH}_4^+$  (starting concentration 35.2  
124  $\text{NH}_4^+$ -N  $\text{mg/l}$ ) and  $\text{NO}_2^-$  (starting concentration 32.5  $\text{NO}_2^-$ -N  $\text{mg/l}$ ) were measured separately  
125 in two different trials at 20°C for 1 hour, with sampling every 10 minutes. Mixing was  
126 achieved by supplying a gas mix consisting of  $\text{N}_2$ -gas and air to the bottom of the reactors at  
127 an approximate total flow of 3 L/min. DO was controlled to 5.5  $\text{mg/L}$  by adjusting the amount  
128 of air in the gas mix. Anaerobic trials of simultaneous removal of  $\text{NH}_4^+$  and  $\text{NO}_2^-$  (starting  
129 concentrations 35.5  $\text{NH}_4^+$ -N and 36.1  $\text{NO}_2^-$ -N  $\text{mg/l}$ ) was measured at 30°C and were run for 2  
130 hours with sampling every 20 minutes. Mixing was achieved by  $\text{N}_2$ -gas from the reactor  
131 bottom. Before commencing the trials, the reactor with substrate was fed with  $\text{N}_2$ -gas until  
132 DO was negligible. Only after DO was negligible the carriers were added and the trials begun.  
133 Samples were collected and filtered through 1.6  $\mu\text{m}$  Munktell MG/A glass fiber filters and  
134 analyzed for  $\text{NH}_4$ -N,  $\text{NO}_2$ -N and  $\text{NO}_3$ -N using standard Hach-Lange kits (LCK 303, 342 and  
135 339, respectively).

## 136 **MATHEMATICAL MODELING**

### 137 **Detailed model description**

138 The goal of the mathematical model was to simulate dissolved oxygen (DO) concentration  
139 profiles and ammonium oxidation rates in biofilms on the Z400 and Z50 carriers. The notation  
140 used in the model is shown in Table S2.

### 141 **Components**

142 The model included three biomass components: aerobic heterotrophs ( $X_H$ ), AOB ( $X_A$ ), and  
143 NOB ( $X_N$ ). It calculated the diffusion and conversions of four soluble components: DO ( $S_O$ ),  
144 nitrite ( $S_N$ ), ammonium ( $S_A$ ), and biodegradable organic carbon ( $S_C$ ).

### 145 **Biochemical conversions**

146 The activities of the three microbial groups ( $X_H$ ,  $X_A$ , and  $X_N$ ) were described using Monod  
147 kinetics. In total six kinetic equations described the rates of growth and decay (Table S3).  
148 Aerobic oxidations of  $S_C$ ,  $S_A$ , and  $S_N$  were considered. Denitrification and anammox were not  
149 included in the model because those processes were assumed to have only minor effect on the  
150 DO concentration profiles. A stoichiometric matrix (Table S4) linked the kinetic equations to  
151 conversion rates of the soluble components. The conversion rate for a component of interest  
152 can be calculated using Equation 1. The kinetic and stoichiometric coefficient values used as  
153 default input to the model are shown in Table S5.

$$154 \quad r_i = \sum_{j=1}^{j=9} x_{ij} \cdot p_j \quad (1)$$

155 where  $r_i$  is the conversion rate of component  $i$ ,  $x_{ij}$  is the stoichiometric coefficient for  
156 component  $i$  and process  $j$ , and  $p_j$  is the rate of process  $j$ .

### 157 **Biofilm model**

158 The biofilm was divided into 1  $\mu\text{m}$  thick layers. Each layer was assumed to have uniform  
159 distribution of biomass- and soluble components. The biomass was distributed into the  
160 biofilm layers based on measured total solids concentrations (16), qFISH and cryosection  
161 FISH images.

162 The concentrations of soluble components in each layer is governed by diffusion (Fick's law)  
163 and biochemical reactions. The reaction-diffusion mass balance equation for a layer in the  
164 biofilm can be written as Equation 2.

165 
$$\frac{dS_m}{dt} = D_e \cdot \frac{(S_{m+1} - 2 \cdot S_m + S_{m-1})}{\Delta x^2} + r \quad (2)$$

166 where  $S_m$  is the substrate component concentration in layer  $m$  ( $\text{g m}^{-3}$ ),  $t$  is time (d),  $D_e$  is the  
 167 effective diffusion coefficient of the substrate inside the biofilm ( $\text{m}^2 \text{s}^{-1}$ ),  $\Delta x$  is the thickness of  
 168 a layer (m), and  $r$  is the conversion rate of  $S$  due to biochemical reactions ( $\text{g m}^{-3} \text{s}^{-1}$ ).

169 The effective diffusion coefficient ( $D_e$ ) was calculated based on the correlation with biofilm  
 170 density observed by L. S. Fan et al. (17)

171 
$$\frac{D_e}{D_w} = 1 - \frac{0.43 \cdot X_V^{0.92}}{11.19 + 0.27 \cdot X_V^{0.99}} \quad (3)$$

172 where  $D_w$  is the diffusion coefficient in water ( $\text{m}^2 \text{s}^{-1}$ ) and  $X_V$  is the biofilm density ( $\text{kg TS m}^{-3}$ ).  
 173  $^3$ ).

174 The reaction-diffusion mass balance was solved using a finite difference method with the  
 175 following boundary conditions. At the bottom of the biofilm the diffusion gradient is zero  
 176 (Equation 4) and at the surface the diffusion gradient is governed by mass transfer from the  
 177 bulk liquid (Equation 5).

178 
$$\frac{dS_0}{dx} = 0 \quad (4)$$

179 
$$\frac{dS_L}{dx} = \frac{D_w}{\delta_{BL}} \cdot (S_B - S_L) \quad (5)$$

180 where  $S_0$  is the concentration at the bottom of the biofilm ( $\text{g m}^{-3}$ ),  $S_L$  is the concentration at the  
 181 outer surface of the biofilm ( $\text{g m}^{-3}$ ),  $\delta_{BL}$  is the liquid-granule boundary layer thickness (m),  
 182 and  $S_B$  is the concentration in the bulk liquid ( $\text{g m}^{-3}$ ).

183 Physical parameter values used as default input to the model are shown in Table S6.

#### 184 **Z50 carriers**

185 The Z50 carriers had a biofilm density of  $3.3 \text{ gTS/m}^2$  and an average thickness of  $45 \text{ }\mu\text{m}$  (16).

186 Cryosection FISH images of the Z50 carriers showed a stratification of the biofilm density,



187 which was used as input to the model (Fig S3A). However, there was no clear stratification of  
188 the distribution of  $X_H$ ,  $X_A$  and  $X_N$ . We therefore assumed that these components were  
189 distributed homogenously throughout the biofilm. The fractions  $X_A$  and  $X_N$  of the active  
190 biomass were both determined to be 22.6% by qFISH; 54.8% was assumed to be  $X_H$ .

### 191 **Z400 carriers**

192 The Z400 carriers had a biofilm density of 14.1 gTS/m<sup>2</sup> and an average thickness of 379  $\mu\text{m}$   
193 (16). The fractions of  $X_A$ ,  $X_N$ , and anammox of the active biomass were 7.4, 12.9, and 2.9%  
194 as determined by qFISH. The remaining part of the active biomass, i.e. 76.8%, was assumed  
195 to be  $X_H$ . The biomass components were distributed in the biofilm based on stratification data  
196 obtained using cryosection FISH images of the biofilm (Fig S3B and S3C).

### 197 **Solving the model**

198 The model was programmed and solved in Python 3.3 with the package Numpy 1.9 installed.  
199 Two important input parameter values were unknown. The fraction of the total dry solids that  
200 was live, active biomass ( $f_{VS}$ ) and the thickness of the diffusion boundary layer between the  
201 bulk liquid and the biofilm ( $\delta_{BL}$ ). Using data from the nitrogen transformation activity tests as  
202 input, the model was solved for  $f_{VS}$  values ranging from 0.2 to 0.8. For each  $f_{VS}$ , the  $\delta_{BL}$  that  
203 resulted in a simulated ammonium consumption rate that equaled the experimentally  
204 measured value was determined. For the Z50 biofilms, the  $\delta_{BL}$  ranged from 1.6  $\mu\text{m}$  to 6.8  $\mu\text{m}$   
205 for  $f_{VS}$  of 0.2 and 0.8, respectively. For the Z400 biofilms, the  $\delta_{BL}$  ranged from 8.9  $\mu\text{m}$  to 16.3  
206  $\mu\text{m}$  for  $f_{VS}$  of 0.2 and 0.8, respectively. The DO concentration profiles that resulted from each  
207 set of  $f_{VS}$  and  $\delta_{BL}$  values are shown as shaded region in Figure 6 in the main article. These  
208 concentration profiles shows the depth to which DO can penetrate in the biofilms. The width  
209 of the shaded regions shows the uncertainty of the model estimations. The model was solved  
210 for the conditions in the nitrogen transformation activity batch tests because detailed  
211 information about ammonium oxidation rates for the two types of carriers was available from

212 those experiments. The conditions were very similar in the pilot-scale reactor; however, the  
213 average DO concentration was slightly lower (5 mg/L in pilot, 5.5-5.6 mg/L in batch tests).  
214 This means that the DO penetration into the biofilms may have been somewhat lower in the  
215 pilot-scale reactor.

216

## 217 REFERENCES

- 218 1. Albertsen M, Karst SM, Ziegler AS, Kirkegaard RH, Nielsen PH. 2015. Back to  
219 Basics – The Influence of DNA Extraction and Primer Choice on Phylogenetic  
220 Analysis of Activated Sludge Communities. *PLOS ONE* 10:e0132783.
- 221 2. Větrovský T, Baldrian P. 2013. The Variability of the 16S rRNA Gene in Bacterial  
222 Genomes and Its Consequences for Bacterial Community Analyses. *PLOS ONE*  
223 8:e57923.
- 224 3. Baptista JDC, Lunn M, Davenport RJ, Swan DL, Read LF, Brown MR, Morais C,  
225 Curtis TP. 2014. Agreement between amoA Gene-Specific Quantitative PCR and  
226 Fluorescence In Situ Hybridization in the Measurement of Ammonia-Oxidizing  
227 Bacteria in Activated Sludge. *Applied and Environmental Microbiology* 80:5901-  
228 5910.
- 229 4. Persson F, Suarez M, Hermansson M, Plaza E, Wilén B-M. 2016. Community  
230 structure of partial nitrification-anammox biofilms at decreasing substrate  
231 concentrations and low temperature *Microb Biotechnol* 154:267-273.
- 232 5. Morgenroth E, Obermayer A, Arnold E, Brühl A, Wagner M, Wilderer PA. 2000.  
233 Effect of long-term idle periods on the performance of sequencing batch reactors.  
234 *Water Science and Technology* 41:105.
- 235 6. Manz W, Amann R, Ludwig W, Wagner M, Schleifer K-H. 1992. Phylogenetic  
236 Oligodeoxynucleotide Probes for the Major Subclasses of Proteobacteria: Problems  
237 and Solutions. *Systematic and Applied Microbiology* 15:593-600.
- 238 7. Behnam F, Vilcinskis A, Wagner M, Stoecker K. 2012. A Straightforward DOPE  
239 (Double Labeling of Oligonucleotide Probes)-FISH (Fluorescence In Situ  
240 Hybridization) Method for Simultaneous Multicolor Detection of Six Microbial  
241 Populations. *Applied and Environmental Microbiology* 78:5138-5142.
- 242 8. Daims H, Lückner S, Wagner M. 2006. daime, a novel image analysis program for  
243 microbial ecology and biofilm research. *Environmental Microbiology* 8:200-213.
- 244 9. Hugerth LW, Wefer HA, Lundin S, Jakobsson HE, Lindberg M, Rodin S, Engstrand  
245 L, Andersson AF. 2014. DegePrime, a Program for Degenerate Primer Design for  
246 Broad-Taxonomic-Range PCR in Microbial Ecology Studies. *Applied and*  
247 *Environmental Microbiology* 80:5116-5123.
- 248 10. Caporaso JG, Lauber CL, Walters WA, Berg-Lyons D, Lozupone CA, Turnbaugh PJ,  
249 Fierer N, Knight R. 2011. Global patterns of 16S rRNA diversity at a depth of millions  
250 of sequences per sample. *Proceedings of the National Academy of Sciences* 108:4516-  
251 4522.
- 252 11. Kozich JJ, Westcott SL, Baxter NT, Highlander SK, Schloss PD. 2013. Development  
253 of a Dual-Index Sequencing Strategy and Curation Pipeline for Analyzing Amplicon

254 Sequence Data on the MiSeq Illumina Sequencing Platform. *Applied and*  
255 *Environmental Microbiology* 79:5112-5120.

256 12. Edgar RC. 2016. UNOISE2: improved error-correction for Illumina 16S and ITS  
257 amplicon sequencing. *bioRxiv* doi:10.1101/081257.

258 13. Edgar R. 2016. SINTAX: a simple non-Bayesian taxonomy classifier for 16S and ITS  
259 sequences. *bioRxiv* doi:10.1101/074161.

260 14. Quast C, Pruesse E, Yilmaz P, Gerken J, Schweer T, Yarza P, Peplies J, Glöckner FO.  
261 2013. The SILVA ribosomal RNA gene database project: improved data processing  
262 and web-based tools. *Nucleic Acids Research* 41:D590-D596.

263 15. Piculell M, Christensson M, Jönsson K, Welander T. 2016. Partial nitrification in  
264 MBBRs for mainstream deammonification with thin biofilms and alternating feed  
265 supply. *Water Sci Technol* 73:1253-1260.

266 16. Piculell M, Suarez C, Li C, Christensson M, Persson F, Wagner M, Hermansson M,  
267 Jönsson K, Welander T. 2016. The inhibitory effects of reject water on nitrifying  
268 populations grown at different biofilm thickness. *Water Res* 104:292-302.

269 17. Fan LS, Leyva-Ramos R, Wisecarver KD, Zehner BJ. 1990. Diffusion of phenol  
270 through a biofilm grown on activated carbon particles in a draft-tube three-phase  
271 fluidized-bed bioreactor. *Biotechnology and Bioengineering* 35:279-286.

272
